# Supplementary material for: Systematic review of risk prediction studies in bone and joint infection: are modifiable prognostic factors useful in predicting recurrence?
Source: Copernicus journal article supplement (doi:10.5194/jbji-6-257-2021), 2021-07-08
Supplement: Supplementary file [file jbji-6-257-2021-supplement.pdf]

Supplement of J. Bone Joint Infect., 6, 257–271, 2021  
<https://doi.org/10.5194/jbji-6-257-2021-supplement>  
© Author(s) 2021. CC BY 4.0 License.

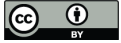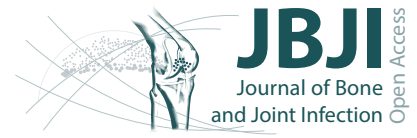

*Supplement of*

## **Systematic review of risk prediction studies in bone and joint infection: are modifiable prognostic factors useful in predicting recurrence?**

**Maria Dudareva et al.**

*Correspondence to:* Maria Dudareva (maria.dudareva@ouh.nhs.uk)

The copyright of individual parts of the supplement might differ from the article licence.



|                                  |      |      |      |      |      |      |      |      |      |
|----------------------------------|------|------|------|------|------|------|------|------|------|
| 2015 [38]                        |      |      |      |      |      |      |      |      |      |
| Chen et al. 2017 [39]            | High | Mod  | High | High | High | High | High | High | High |
| Cochran et al. 2016 [40]         | High | Mod  | High | High | High | High | High | High | High |
| Cook et al. 2007 [41]            | High | High | High | High | High | High | High | High | High |
| Faschingbauer et al. 2019 [42]   | High | High | High | High | High | High | Mod  | High | High |
| Ford et al. 2018 [43]            | High | High | High | High | High | High | High | High | High |
| Garcia del Pozo et al. 2018 [44] | High | High | High | High | High | High | High | High | High |
| Grossi et al. 2016 [45]          | High | High | High | High | High | High | Mod  | High | High |
| Hoell et al. 2016 [46]           | High | High | Low  | High | High | High | Mod  | High | High |
| Jhan et al. 2017 [47]            | High | High | High | High | High | High | Mod  | High | High |
| Kandel et al. 2019 [48]          | High | Mod  | High | High | High | High | Mod  | High | High |
| Kurd et al. 2010 [50]            | High | High | High | High | High | High | Mod  | High | High |
| Lam et al. 2019 [51]             | High | Mod  | Low  | High | High | High | High | High | High |
| Lange et al. 2016 [52]           | Mod  | High | Mod  | High | High | High | Mod  | High | High |
| Ma et al. 2018 [53]              | High | Low  | High | High | High | High | Mod  | High | High |
| Merlet et al. 2014 [54]          | High | Low  | High | High | High | High | Mod  | High | High |
| Mortazavi et al. 2011 [55]       | Mod  | Low  | High | High | High | High | Mod  | High | High |
| Petis et al. 2019 [56]           | High | Mod  | High | High | High | High | Mod  | High | High |
| Russell & Tsang et al. 2020 [57] | High | Mod  | High | High | High | High | High | High | High |
| Sakellariou et al. 2015 [59]     | High | High | High | High | High | High | Mod  | Mod  | High |
| Son et al. 2017 [60]             | High | High | High | High | High | High | Mod  | High | High |

|                              |      |      |      |      |      |      |      |      |
|------------------------------|------|------|------|------|------|------|------|------|
| Souza Jorge et al. 2017 [61] | High | High | Mod  | High | High | High | High | High |
| Wang Q et al. 2019 [62]      | High | Low  | High | Mod  | High | Low  | Mod  | High |
| Wang SH et al. 2019 [63]     | High | Low  | High | High | High | Mod  | High | High |
| Watts et al. 2014 [64]       | Mod  | Low  | High | High | High | Mod  | High | High |
